1 **Label-free Raman microspectroscopy for identifying virocells**

2

3 Indra Monsees<sup>1\*</sup>, Victoria Turzynski<sup>1</sup>, Sarah P. Esser<sup>1</sup>, André Soares<sup>1</sup>, Lara I. Timmermann<sup>1</sup>,  
4 Katrin Weidenbach<sup>2</sup>, Jarno Banas<sup>3</sup>, Michael Kloster<sup>4</sup>, Bánk Beszteri<sup>4</sup>, Ruth A. Schmitz<sup>2</sup>, and  
5 Alexander J. Probst<sup>1\*</sup>

6

7 <sup>1</sup> University Duisburg-Essen, Group for Aquatic Microbial Ecology, Environmental Microbiology  
8 and Biotechnology, Essen, Germany

9 <sup>2</sup> Christian Albrechts University, Institute for General Microbiology, Kiel, Germany

10 <sup>3</sup> Not affiliated

11 <sup>4</sup> University Duisburg-Essen, Phycology Group, Faculty of Biology, Germany

12

13 \* to whom the correspondence should be addressed:

14 Indra.monsees@uni-due.de and alexander.probst@uni-due.de

15

16 **Abstract**

17 Raman microspectroscopy has been thoroughly used to assess growth dynamics and  
18 heterogeneity of prokaryotic cells. Yet, little is known about how the chemistry of individual  
19 cells changes during infection with lytic viruses, resulting in so-called virocells. Here, we  
20 investigate biochemical changes of bacterial and archaeal cells of three different species in  
21 laboratory cultures before and after addition of their respective viruses using single-cell Raman  
22 microspectroscopy. By applying multivariate statistics, we identified significant differences in  
23 the spectra of single cells and cells after addition of lytic phage (*phi6*) for *Pseudomonas*

24 *syringae*. A general ratio of wavenumbers that contributed the greatest differences in the  
25 recorded spectra was defined as an indicator for virocells. Based on reference spectra, this  
26 difference is likely attributable to an increase in nucleic acid vs. protein ratio of virocells. This  
27 method proved also successful for identification of *Bacillus subtilis* cells infected with *phi29*  
28 displaying a decrease in respective ratio but failed for archaeal virocells (*Methanosarcina mazei*  
29 with Methanosarcina Spherical Virus) due to autofluorescence. Multivariate and univariate  
30 analyses suggest that Raman spectral data of infected cells can also be used to explore the  
31 complex biology behind viral infections of bacteria. Using this method, we confirmed the  
32 previously described two-stage infection of *P. syringae*'s *phi6* and that infection of *B. subtilis* by  
33 *phi29* results in a stress response within single cells. We conclude that Raman  
34 microspectroscopy is a promising tool for chemical identification of Gram-positive and Gram-  
35 negative virocells undergoing infection with lytic DNA or RNA viruses.

36

### 37 **Importance**

38 Viruses are highly diverse biological entities shaping many ecosystems across Earth. Yet,  
39 understanding the infection of individual microbial cells and the related biochemical changes  
40 remains limited. Using Raman microspectroscopy in conjunction with univariate and  
41 unsupervised machine learning approaches, we established a marker for identification of  
42 infected Gram-positive and Gram-negative bacteria. This non-destructive, label-free analytical  
43 method at single-cell resolution paves the way for future studies geared towards analyzing  
44 complex biological changes of virus-infected cells in pure culture and natural ecosystems.

45

## 46 **Introduction**

47 Prokaryotic viruses substantially influence global ecosystems and biogeochemical cycles  
48 by infecting host populations. This predation can cause release of organic carbon and also  
49 enhance horizontal gene transfer (1), as viruses can act as mobile genetic elements (MGEs).  
50 Viruses are generally differentiated based on the type of genetic information stored in their viral  
51 particle - either single or double-stranded DNA or RNA (2). Viruses are also categorized based on  
52 their reproduction cycle as lysogenic or lytic (although seldomly other strategies like chronic  
53 infection or pseudolysogeny have been reported (3)). Viruses can insert their genetic  
54 information into the genome of an infected host and proliferate along with host reproduction  
55 (lysogeny). A lytic strategy involves the reorganization of host metabolism envisaging  
56 reproduction of viral particles and ultimately cell lysis. A host cell infected with a lytic virus is  
57 referred as a virocell and needs to be differentiated from ribocells, cells that generally  
58 proliferate irrespective of an infection (4). In a recent study, transcriptomics and proteomics  
59 were used to investigate whether metabolic differences between uninfected cells and virocells  
60 can impact an entire ecosystem (5). However, the study of virocells necessitates techniques that  
61 can capture virocell characteristics at the single cell level prior to cell lysis.

62 The development of confocal Raman microspectroscopy has enabled the measurement  
63 of single microbial cells (6), which consequently opened the possibility to gain insights into the  
64 heterogeneity of microbial communities (7). The combination of Raman microspectroscopy  
65 instruments with multivariate data analysis of digitally recorded spectra allowed for further  
66 increases in sensitivity in the last two decades, resulting in the detection of biochemical  
67 differences between bacterial species across growth phases (8). In this context, multivariate  
68 statistical analysis of Raman spectra has been used to differentiate single cells based on discrete

69 wavenumbers corresponding to biochemical compounds. Huang and colleagues described a  
70 correlation between the fraction of  $^{13}\text{C}$  in the carbon source and a ratio shift based on Raman  
71 peaks of unlabeled  $^{12}\text{C}$  phenylalanine and  $^{13}\text{C}$  labeled phenylalanine (9). The ratio between  
72 isotopically labeled and unlabeled molecules can be applied to identify key degraders in mixed  
73 cultures and allows specific cell sorting for single cell methods (10). However, this sensitivity is  
74 also the bottleneck of this technique, as demonstrated by Garcia-Timmerman, who highlighted  
75 the influence of the sample preparation on the recorded spectra (11). Such differences  
76 complicate the construction of a public database and comparability of spectra across studies.  
77 Nevertheless, the comparison of selected wavenumbers between individual spectra of a single  
78 study is crucial for expeditious categorization of single cells based on their chemical  
79 composition.

80         In this study, the high sensitivity of Raman microspectroscopy to identify and  
81 characterize microstructural intracellular changes as well as viruses and their effects on host  
82 metabolism was harnessed to test whether this technology can be used in differentiating  
83 regular cells from virocells. To this end, three different model host-virus systems including DNA  
84 and RNA virus were used to analyze and monitor chemical changes during infection processes at  
85 single-cell level using a Raman microspectroscope. Multivariate statistics and unsupervised  
86 machine learning suggested identical wavenumbers contribute to differences between virocells  
87 and regular bacterial cells across our model systems. These wavenumbers were attributed to  
88 the ratio of nucleic acids and proteins, respectively, and are thus in congruence with current  
89 literature (5, 12, 13) regarding the differences of expression profiles of virocells.

90

91 **Results**

92 ***Hundreds of spectra acquired for individual cells display significant differences in the chemical***  
93 ***composition of infected and uninfected cultures of *P. syringae****

94       Addition of *phi6* to *P. syringae* cultures resulted in the expected decline in optical  
95 density, enabling us to harvest cell populations representing a mixture of virocells and  
96 uninfected cells (Fig. 1A). We used this cell population and a culture without phage addition for  
97 comparison in single cell Raman microspectroscopy. In doing so, we successfully measured 448  
98 high-quality spectra of individual *P. syringae* cells, of which 198 cells were measured after  
99 addition of *phi6*. The other 250 spectra were reference spectra from uninfected cells of *P.*  
100 *syringae*. Inspection of the spectra and comparison to previously published Raman spectra of  
101 bacteria confirmed the typically expected peaks for biomolecules confirming the measurement  
102 of actual microbial cells (8).

103       Using the individual spectra of each measured cell, we computed an ordination analysis  
104 comparing individual cells of cultures with and without phage addition, which showed  
105 substantial differences (Fig. 1B). Importantly, the two datasets (with and without phage  
106 addition) were not entirely separated along Principal Component 1 (PC 1) or PC 2 but showed  
107 differences along both PCs, which agrees with the abovementioned mixture of virocells and  
108 uninfected cells in populations after phage addition. MRPP analysis displayed a highly significant  
109 p-value (<0.001), with a chance-corrected within group agreement (A) of 0.062. Consequently,  
110 phage addition and infection showed a significant and substantial change in the (bio)chemical  
111 composition of individual cells resulting in virocells.

112       To challenge the results of the observed differences between cultures with and without  
113 phage addition, we applied the abovementioned multivariate analysis to two different time

114 points of the same uninfected culture of *P. syringae*. This experiment was set out with the aim  
115 of testing the null hypothesis that the differences between amended and non-amended cultures  
116 originate from variation during growth phases of cultures, which is known to exist in bacteria  
117 (8). The respective PCA (Fig. S2), which also includes the data from the amended cell culture,  
118 displays a difference of two timepoints along PC 2. However, the intragroup dissimilarity of the  
119 two individual timepoints was substantially lower than for the population amended with phage,  
120 particularly along the major component of the PCA. Although the MRPP testing for differences  
121 between the uninfected cultures at the two time points resulted in a significant p-value (0.002),  
122 the chance-corrected within group agreement was less than a sixth (0.009) of those identified  
123 for differences between cultures with and without phage addition. Moreover, comparing the  
124 combination of both time points of the uninfected culture to one with phage addition, we  
125 identified a highly significant difference (MRPP, p-value < 0.001, A = 0.06). Based on these  
126 observations the null hypothesis was rejected, supporting the working hypothesis that  
127 uninfected cultures can be distinguished from cultures with virocells using Raman spectroscopy.

128

129 ***Differentiating wavenumbers of uninfected cells and virocells are attributable to nucleic acid***  
130 ***and protein Raman shifts in P. syringae***

131 To investigate the exact differences between cultures with and without phage addition as  
132 displayed in the PCA (Fig. 1B), we used the system of *P. syringae* / *phi6* for an in-depth statistical  
133 analysis. Comparing the contrast plot of phage-amended and non-amended cultures with the  
134 major two components of the PCA, highlighted the contribution of the individual wavenumbers  
135 that discriminate the two groups (cultures with and without phage addition; Fig 2A). Six  
136 wavenumbers contribute the most to the differences between the average spectra of the two

137 groups with a high contribution to the PCA or a high density at the contrast plots and these are  
138 assigned to their respective biomolecules in Table 1.

139 Three of the wavenumbers with the highest density in the contrast plot were assigned to  
140 nucleic acids (785, 1483 and 1576 1/cm), of which one was significantly higher in cultures  
141 amended with phage based on a Wilcoxon test ( $p_{785} = 0.15$ ,  $p_{1483} = 0.71$ ,  $p_{1576} = 2.2 \cdot 10^{-16}$ ,  
142 respectively). By contrast, peaks assigned to proteins (1003 and 1671 1/cm) and lipids  
143 (1448 1/cm) are more prominent in the control sample, and the corresponding p-values of the  
144 proteins were significant (Wilcoxon test,  $p_{1003} = 1.7 \cdot 10^{-15}$ ,  $p_{1671} = 2.2 \cdot 10^{-16}$ ,  $p_{1448} = 0.71$ ,  
145 respectively). Noteworthy, the wavenumbers associated with (highly) significant changes (1003,  
146 1576 and 1671 1/cm) contributed to PC 1, while the other three with insignificant changes  
147 between phage amended and non-amended contributed more to PC 2 (785, 1440 and  
148 1483 1/cm) (Fig. 2A). The intensities (I) of three wavenumbers with significant p-values were  
149 used to determine a differentiator for univariate differentiation of *P. syringae* virocells from  
150 uninfected cells (equation 1):

$$\text{Ratio}_{\text{virocell}} = \frac{\text{NucleicAcids}}{\text{Proteins}} = \frac{I_{1576} \cdot 2}{I_{1003} \cdot I_{1671}}$$

151 with wavenumbers assigned to proteins (1003 and 1671 1/cm) in the denominator and  
152 the nucleic acid peak (1576 1/cm) in the numerator. The Shapiro test demonstrated that the  
153 ratios based on spectra of the control sample based on equation 1 were normally distributed (p-  
154 value = 0.07) and those of the infected sample were not (p-value =  $5.99 \cdot 10^{-9}$ ), which was  
155 expected since the latter represent a mixture of virocells and uninfected cells. The calculated  
156 confidence intervals indicate, that *P. syringae* cells of the control group do not exceed a ratio of  
157 above 1.06 (99% probability), while this threshold was indeed exceeded (with a probability of 45

158 %, 66 of 198 cells) in the sample after phage addition. Consequently, equation 1 can be used to  
159 identify potential virocells in cultures of *P. syringae* (Fig 2C).

160

161 ***Validation of selected wavenumbers for virocell identification of P. syringae via VIP of the***  
162 ***OPLS model indicates high influence by peak shoulders***

163 The average Raman spectra of the control sample and the infected sample show clear  
164 differences in the intensity of prominent biomolecule peaks chosen for the ratio determination  
165 (Fig 2B). However, plotting the peak maxima of the VIP of the OPLS together with the average  
166 Raman spectra revealed that the differences in virocells are sometimes not only represented by  
167 the maximum of the peak but also by its shoulders. This is a fine detail that is overseen by just  
168 visually inspecting the average spectra. The peaks can be assigned to their biomolecular origin  
169 (chemical bond) since their position does not change with a change in the molecular  
170 environment. However, the width of the peak is dependent on the composition of the molecule  
171 surrounding the polarized bond (14). Although the intensity change cannot be determined  
172 between two groups, this approach confirms the selected wavenumbers for the determined  
173 ratio for virocell identification in *P. syringae*.

174

175 ***Applicability of virocell identification across three different species***

176 Based on the differentiating ratio determined for virocells and uninfected cells of *P. syringae*  
177 (equation 1), we tested its applicability to other microbial species by repeating the analysis  
178 performed with *P. syringae* for *B. subtilis* and *M. mazei*. We calculated the ratios (equation 1)  
179 for cultures with and without virus addition, which showed a significant difference for *P.*  
180 *syringae* and *B. subtilis* ( $p$ -value < 0.0001, Fig. 3). By contrast, only a trend was revealed for the



181 *M. mazei* / MetSV system (p-value < 0.0649; Fig. 3) without visible differences in PCA and  
182 contrast plot analysis (Fig. S3).

183 For the *B. subtilis* / *phi29* system, a group of potential virocells could be differentiated  
184 from the control sample along PC 2 (Fig. 4C), yet the contrast plot (Fig. 4A) shows a lower  
185 density range than the one for *P. syringae* (Fig. 2A). The highest values contributing to spectra of  
186 infected cells were associated with nucleic acids and proteins (Wilcox test:  $p_{785} = 3.4 \cdot 10^{-11}$ ,  $p_{1483}$   
187  $= 3.0 \cdot 10^{-12}$ ,  $p_{1003} = 0.15$  and  $p_{1671} = 9.5 \cdot 10^{-12}$ ), while peaks with the wavenumbers for  
188 hydrocarbons and nucleic acids were enriched in uninfected cells ( $p_{1131} = 1.7 \cdot 10^{-8}$ ,  $p_{1550} < 2.2 \cdot 10^{-}$   
189  $^{16}$ ,  $p_{1589} < 2.2 \cdot 10^{-16}$ ). Importantly, these identified wavenumbers included the same  
190 wavenumbers that were determined for the ratio (equation 1) for *P. syringae*. Although the  
191 associated signals of biomolecules were inverted compared to *P. syringae*, i.e., proteins were  
192 substantially higher in designated virocells and nucleic acids declined, the respective ratio  
193 (equation 1) can still be used to identify potential virocells of *B. subtilis* in Raman spectroscopy  
194 (Fig. 4).

195

## 196 Discussion

197 In this manuscript we measured several hundred individual bacterial and archaeal cells (Fig. S4)  
198 to identify common changes in Raman spectra due to viral infections. One major challenge  
199 associated with measuring cultures of infected cells was their heterogeneity, meaning the  
200 culture consisting of uninfected cells and virocells at the same time. However, we were able to  
201 identify a specific ratio of Raman spectra that enabled us the differentiation of virocells and  
202 ribocells cells in the cultures of *P. syringae* and *B. subtilis*. This ratio was based on the

203 wavenumbers 1003, 1576 and 1671 1/cm, which can be assigned to proteins and nucleic acid  
204 changes based on existing literature of recoded Raman spectra (12, 13).

205

### 206 ***Overcoming challenges in identifying a Raman spectrum-based marker for virocells***

207 For identification of a Raman spectrum-based marker of virocells, it was mandatory to use  
208 univariate and multivariate statistics (non-supervised machine learning) in concert. Neither  
209 univariate nor multivariate statistics alone were successful in identifying the respective  
210 wavenumbers necessary for the differentiation of virocells from uninfected cells.

211 To initially identify a set of wavenumbers that showed differences between these two cell types  
212 we applied a multivariate analysis resulting in six wavenumbers, which were further filtered  
213 based on a Wilcoxon test to create the respective equation for differentiation of the two cell  
214 types. This was partly due to the fact, that multiple PCs can contribute to differences in  
215 statistical populations at various intensities, while we focused only on the two PCs with the  
216 greatest Eigenvalues. Two peaks of contributing substantially to PC 2 of both bacteria studied  
217 herein are assigned to guanine (1483 1/cm) (13) and the ring breathing of cytosine and uracil  
218 (785 1/cm) (12). Although this suggests a strong involvement of nucleic acid changes in  
219 uninfected vs. virocells, the Wilcoxon Test did not indicate a significant difference  
220 demonstrating an insufficient picture provided by multivariate data analysis (MRPP). On the  
221 other hand, using univariate statistics alone, the highest differences for the populations of *B.*  
222 *subtilis* did not occur at the maximum of the peak (1579 1/cm), which we determined from  
223 using both methods. Instead, the contrast plot had the highest values at the shoulders of the  
224 maximum peak, at 1550 1/cm and 1589 1/cm, suggesting that the peak position must be  
225 considered in Raman spectra via multivariate statistic. The reason for this phenomenon of the

226 breadth of the peak can be traced back to the chemical environment of the molecule as the Raman  
227 shift is characteristic for the polarized chemical bond. Several studies about differences of  
228 Raman spectra of packed and unpacked viral DNA/RNA and protein/oligonucleotide interactions  
229 have been performed in the past and describe altered base environments as reason for the  
230 observation of such perturbations (14–16).

231

### 232 ***Phi29 likely causes a stress response in B. subtilis***

233 The determined equation for differentiating virocells from ribocells in the *P. syringae-phi6*  
234 system, could also be applied to the *B. subtilis-phi29* system. However, the ratio used for the  
235 differentiation was significantly lower in the *B. subtilis* system, which is in stark contrast to the  
236 significantly higher ratio for *P. syringae*. The respective wavenumbers attributable to proteins  
237 (1003, 1671 1/cm) showed an increase in intensity in *B. subtilis*, and nucleic acids (1576 1/cm)  
238 appeared to decrease substantially during infection with *phi29*. A drop in nucleic acid content  
239 and increase in protein content (as observed here for virocells of *B. subtilis*) is complementary  
240 to multiple biological processes that can be observed for bacteria. Chemicals like ethanol can  
241 cause a similar change in the protein and nucleic acid content, which represents a stress  
242 response by the bacterium. This stress response was detected based on the same changes in the  
243 wavenumbers as observed here (17). However, the induction of lysogenic phage in *B. subtilis*  
244 was shown to result in a decrease of the Raman shifts at 782, 1095 1/cm and only a slight  
245 decrease at 1452, 1659 1/cm (18). The authors of the aforementioned study concluded that  
246 these measurements likely stem from the fact that the measured cell had ruptured, and an  
247 empty cellular hull had been measured (consisting of proteins and lipids, while nucleic acids are  
248 lost during lysis). They used Raman shifts around 1095 1/cm and 785 1/cm to measure the

249 respective differences in the nucleic acid, both of which, did not show a significant difference in  
250 our datasets. Comparing these previous findings to our results for *B. subtilis*, someone can likely  
251 not differentiate between *B. subtilis* cells showing a stress response and a respective virocell.  
252 We conclude that *phi29* causes a stress response in *B. subtilis* during infection, which we  
253 measured during Raman spectra acquisition.

254

### 255 ***High sensitivity of Raman spectra mirrors different types of phage infection***

256 The changes in nucleic acid and protein content are contradictory in the *P. syringae* and the *B.*  
257 *subtilis* system and could not solely be attributed to complex stress responses, but rather to  
258 different types of phages. While *phi6* infecting *P. syringae* is a non-tailed RNA phage with a lipid  
259 membrane (19, 20), *phi29* is an DNA phage with a complex polypeptide structure consisting of a  
260 phage head and a phage tail (21). Consequently, an increase in the protein content during *phi29*  
261 replication can be associated with an increase in protein content in the cell. The wavenumber  
262 1671 1/cm has previously been associated not only with the amides but also with thymine, a  
263 central component of DNA but not RNA (Table 1). Comparing the RNA phage *phi6* and the DNA  
264 phage *phi29*, we did observe a difference at the thymine concentration at this wavelength. A  
265 similar trend (increase in thymine/protein concentration) was also observed for the *M. mazei*  
266 system, which is also based on a DNA virus. We conclude that the putative increase of proteins  
267 measured at 1671 1/cm stems from an increase in protein and thymine concentration at the  
268 same time, reflecting the difference in DNA and RNA phage used in the experiments.  
269 Beyond the different types of phages, the relatively slow maturation of the *phi6* viral particles  
270 usually encompasses two different stages within the *P. syringae* host: After 45 min 50-nm  
271 particles can be observed within the host, and after 80 min these particles are covered by the

272 viral membrane (22). The plot of the PCA in Fig 1 shows that infected cultures of *P. syringae*  
273 differed along both components. Component one was used for the ratio determination, but the  
274 ratio did not include spectra of individual virocells that showed a difference along component  
275 two. The shift of these virocells along PC2 was associated with a single wavenumber at 1448  
276 1/cm. This wavenumber indicates an increase of lipids, which agrees with the production of lipid  
277 membranes for viral particle maturation (22). Consequently, we did not only succeed in  
278 identification of virocells of *P. syringae*, but also distinguishing the two infection stages during  
279 *phi6* maturation based on our Raman spectra.

280

## 281 **Conclusion**

282 Our data encompassing 1,287 Raman spectra acquired for individual cells of three different  
283 microbial species with and without virus addition suggests that at least bacterial virocells can be  
284 differentiated from uninfected cells. We present a ratio of three wavenumbers that can be  
285 utilized to quickly perform this differentiation, although the type of phage (RNA vs. DNA) and  
286 different infection stages can influence the detection. Beyond detection, Raman spectra of  
287 individual cells are sensitive enough to capture essential information on the biology of individual  
288 phage-host systems. Namely, DNA and RNA phages, stress responses to the differentiation of  
289 maturation stages of phages within the microbial host cell can be robustly identified. We predict  
290 that the identification of such cells in batch culture experiments and ultimately in  
291 environmental samples will aid studying the biology of individual virocells and thus expand our  
292 understanding of the complex interplay of phage and hosts along with their associated  
293 biochemistry.

294

295 **Material and Methods**

296 ***Cultivation of model systems and sampling strategy***

297 Two cultures of *Pseudomonas syringae* (DSM21482) were incubated at 25 °C with 150 rpm in  
298 Tryptone soya broth (DSM medium 545). After 24 h, the cultures reached the exponential  
299 growth phase and 1 vol% glycerol stock of the phage *phi6* (DSM21518) was added to one  
300 culture, the second culture was kept uninfected as negative control. Samples for Raman  
301 microspectroscopy were taken prior to phage addition and 10 hours after infection, indicated by  
302 a drop of the optical density.

303 *Bacillus subtilis* (DSM5547) was incubated at 37 °C with 150 rpm in DSM medium 545. After 4 h,  
304 the cultures reached the exponential growth phase and 10 vol% of a phage *phi29* solution  
305 (DSM5546) was added to one culture, the second culture was kept uninfected as control. The  
306 shaking was reduced to 80 rpm. Samples for Raman microspectroscopy were taken when the  
307 optical density dropped 2 h after infection (Fig. S5).

308 *Methanosarcina mazei* (DSM3647) was incubated and infected with Methanosarcina spherical  
309 virus (MetSV) as described previously (23). Samples for Raman spectroscopy were taken  
310 anaerobically before virus infection and 180 and 210 min after infection.

311

312 ***Sample preparation for Raman microspectroscopy***

313 Samples for Raman microspectroscopy were taken at respective time points from the model  
314 systems (see above). 1 mL of the culture was washed with 1 mL 1X PBS (pH 7.4, Sigma-Aldrich),  
315 followed by resuspension in 0.45 mL 1X PBS and 0.15 mL 4 % formaldehyde (Thermo scientific)  
316 solution (fixation at 4 °C for 3 h). Afterwards the sample was again washed in 0.5 mL 1X PBS and  
317 dehydrated at room temperature in 50 vol% and 80 vol % ethanol (Fisher Scientific) for 10 min

318 each. Finally, the preparation was stored in 0.15 mL 96 % ethanol at -20 °C until spectral  
319 acquisition. Throughout all steps mentioned above, washing was done by pelleting of samples  
320 via centrifugation at 2,000 x g for 10 min, followed by discarding the supernatant.

321

### 322 ***Raman spectral acquisition***

323 Raman spectral acquisition was performed using a Renishaw in via™ Raman microspectroscope  
324 with a 532 nm Nd:YAG laser and 1800 l/mm grating, equipped with a Leica DM2700M  
325 microscope. A 100x dry objective with a numerical aperture of 0.85 was used. Daily calibration  
326 was performed using a silicon waver (Renishaw). For each dehydrated sample (preparation see  
327 above), a drop was placed on a highly polished steel slide (Renishaw) and air dried. For  
328 *Pseudomonas syringae* a spectral acquisition of 25-30 s at 10 % laser power and for *Bacillus*  
329 *subtilis* three accumulations of 25 s and 5 % laser power was used. For cells of *Methanosarcina*  
330 *mazei* a 15 s bleaching step prior to 30 s measurement at 5 % laser power was necessary to  
331 reduce the florescent background. At least 50 cells per drop were measured and at minimum  
332 three drops per sample were used.

333

### 334 ***Multivariate statistical analyses***

335 The spectra were imported to R (24) as SPC files and processed using R package *MicroRaman*  
336 (11). The spectral data were trimmed to a range of 600-1800 1/cm. After background  
337 subtraction using the Statistics-sensitive Non-linear Iterative Peak-clipping (SNIP) algorithm (25),  
338 data were normalized using Total Ion Current (TIC) (26). These preprocessed data were used to  
339 calculate Principal Components Analyses (PCA) (27) and dendrograms based on Euclidian  
340 distance (Ward D2 clustering) (24). PCA results were compared to Principal Coordinate Analyses

341 (PCoA) (28) based on spectral contrast angle dissimilarities (11). Spectra of cells burnt during  
342 spectral acquisition, spectra of low intensity and those containing cosmic rays were identified  
343 and removed from the dataset. Wavenumbers causing differences between infected and  
344 uninfected spectra were identified using a contrast plot (11) and the influence on the principal  
345 components. Differences between the samples assessed via a Multi Response Permutation  
346 Procedure (MRPP) using 999 Monte Carlo permutations.

347 An orthogonal partial least square analysis (OPLS) (29) was performed on the baseline corrected  
348 data. The spectra were divided into "Species\_control" or "Species\_infected" according to the  
349 sample their originated from. The variable importance on projection (VIP) for each wavenumber  
350 in the range of 600 -1800 1/cm was determined and compared with the density of the contrast  
351 plot and the principal components.

352 The mean spectrum of each class was calculated by determining the mean intensity at each  
353 wavenumber.

354

### 355 ***Determination of differentiating ratio of virocells and uninfected cells***

356 Different combinations of the intensities of the three wavenumbers with the most  
357 influence in the contrast plots (contrasting virocells and uninfected cells) of the *P. syringae-phi6*  
358 system were further analyzed. The average intensities and the standard deviation were  
359 calculated for the normalized data of the uninfected cells and potential virocells. Then a Shapiro  
360 test for normal distribution was performed and a Wilcoxon test for non-normal distributed data  
361 was used to test if the data from infected and uninfected show a significant difference. For each  
362 ratio a cut-off value was defined to declare a cell as infected. The 99%-confidence interval was  
363 calculated for the infected group and the control group, afterwards the number of false positive



364 spectra inside the control group was determined. The results derived from the *P. syringae-phi6*  
365 system for identification of differentiating wavenumbers was then applied to the other virus-  
366 host systems and a Dunn's test was performed to differentiate between host type coupled to  
367 either infected/uninfected cultures (<https://github.com/cran/dunn.test>) (30).

368 In order to identify the respective Raman spectra and relate them to biomolecules, we  
369 followed various publications by G. J. Thomas and co-workers, which resulted in a collection of  
370 Raman spectra of nucleic acids and proteins (12) and De Gelder (13), who conducted a study on  
371 pure solutions of biomolecules. The assignments are summarized in Table 1.

372

### 373 **Acknowledgements**

374 This work was supported by the DFG Grant PR1603/2-1. IM was supported by the  
375 Studienstiftung des deutschen Volkes, AJP acknowledges funding by the Ministry of Culture and  
376 Science of North Rhine-Westphalia (Nachwuchsgruppe "Dr. Alexander Probst"). We thank  
377 Sabrina Eisfeld and Agathe Materla for lab management and technical assistance. Priyanka  
378 Mishra and Rainer Meckenstock are acknowledged for support with the Raman  
379 microspectroscope.

380

### 381 **Conflict of interest**

382 The authors declare no conflict of interest

383

### 384 **References**

385 1. Rohwer F, Prangishvili D, Lindell D. 2009. Roles of viruses in the environment. *Environ*  
386 *Microbiol* 11:2771–2774.

- 387 2. Baltimore D. 1971. Expression of animal virus genomes. *Bacteriol Rev* 35:235–241.
- 388 3. Hobbs Z, Abedon ST. 2016. Diversity of phage infection types and associated  
389 terminology: the problem with ‘Lytic or lysogenic.’ *FEMS Microbiol Lett* 363.
- 390 4. Forterre P. 2013. The virocell concept and environmental microbiology. *ISME J* 7:233–  
391 236.
- 392 5. Howard-Varona C, Lindback MM, Bastien GE, Solonenko N, Zayed AA, Jang H,  
393 Andreopoulos B, Brewer HM, Glavina del Rio T, Adkins JN, Paul S, Sullivan MB, Duhaime MB.  
394 2020. Phage-specific metabolic reprogramming of virocells. *ISME J* 14:881–895.
- 395 6. Puppels GJ, de Mul FFM, Otto C, Greve J, Robert-Nicoud M, Arndt-Jovin DJ, Jovin TM.  
396 1990. Studying single living cells and chromosomes by confocal Raman microspectroscopy.  
397 *Nature* 347:301–303.
- 398 7. Schuster KC, Urlaub E, Gapes JR. 2000. Single-cell analysis of bacteria by Raman  
399 microscopy: spectral information on the chemical composition of cells and on the heterogeneity  
400 in a culture. *J Microbiol Methods* 42:29–38.
- 401 8. Huang WE, Griffiths RI, Thompson IP, Bailey MJ, Whiteley AS. 2004. Raman Microscopic  
402 Analysis of Single Microbial Cells. *Anal Chem* 76:4452–4458.
- 403 9. Huang WE, Stoecker K, Griffiths R, Newbold L, Daims H, Whiteley AS, Wagner M. 2007.  
404 Raman-FISH: combining stable-isotope Raman spectroscopy and fluorescence in situ  
405 hybridization for the single cell analysis of identity and function. *Environ Microbiol* 9:1878–1889.
- 406 10. Lee KS, Palatinszky M, Pereira FC, Nguyen J, Fernandez VI, Mueller AJ, Menolascina F,  
407 Daims H, Berry D, Wagner M, Stocker R. 2019. Publisher Correction: An automated Raman-  
408 based platform for the sorting of live cells by functional properties. *Nat Microbiol* 4:902–903.
- 409 11. García-Timmermans C, Rubbens P, Kerckhof F-M, Buyschaert B, Khalenkow D, Waegeman

- 410 W, Skirtach AG, Boon N. 2018. Label-free Raman characterization of bacteria calls for  
411 standardized procedures. *J Microbiol Methods* 151:69–75.
- 412 12. Benevides JM, Tsuboi M, Bamford JK, Thomas GJ. 1997. Polarized Raman spectroscopy of  
413 double-stranded RNA from bacteriophage phi6: local Raman tensors of base and backbone  
414 vibrations. *Biophys J* 72:2748–2762.
- 415 13. De Gelder J, De Gussem K, Vandenabeele P, Moens L. 2007. Reference database of  
416 Raman spectra of biological molecules. *J Raman Spectrosc* 38:1133–1147.
- 417 14. Thomas GJ. 1999. Raman Spectroscopy of Protein and Nucleic Acid Assemblies. *Annu Rev*  
418 *Biophys Biomol Struct* 28:1–27.
- 419 15. Benevides JM, Terwilliger TC, Vohník S, Thomas GJ. 1996. Raman Spectroscopy of the Ff  
420 Gene V Protein and Complexes with Poly(dA): Nonspecific DNA Recognition and Binding.  
421 *Biochemistry* 35:9603–9609.
- 422 16. Prescott B, Sitaraman K, Argos P, Thomas GJ. 1985. Protein-RNA interactions in  
423 belladonna mottle virus investigated by laser Raman spectroscopy. *Biochemistry* 24:1226–1231.
- 424 17. Teng L, Wang X, Wang X, Gou H, Ren L, Wang T, Wang Y, Ji Y, Huang WE, Xu J. 2016.  
425 Label-free, rapid and quantitative phenotyping of stress response in *E. coli* via ramanome. *Sci*  
426 *Rep* 6:34359.
- 427 18. Wu M, Li W, Christie G, Setlow P, Li Y. 2020. Characterization of Heterogeneity and  
428 Dynamics of Lysis of Single *Bacillus subtilis* Cells upon Prophage Induction During Spore  
429 Germination, Outgrowth, and Vegetative Growth Using Raman Tweezers and Live-Cell Phase-  
430 Contrast Microscopy. *Anal Chem* <https://doi.org/10.1021/acs.analchem.0c03341>.
- 431 19. Vidaver AK, Koski RK, Van Etten JL. 1973. Bacteriophage  $\phi$ 6: a Lipid-Containing Virus of  
432 *Pseudomonas phaseolicola*. *J Virol* 11:799.

- 433 20. Laurinavičius S, Käkelä R, Bamford DH, Somerharju P. 2004. The origin of phospholipids  
434 of the enveloped bacteriophage phi6. *Virology* 326:182–190.
- 435 21. Hemphill HE, Whiteley HR. 1975. Bacteriophages of *Bacillus subtilis*. *Bacteriol Rev*  
436 39:257–315.
- 437 22. Bamford DH, Palva ET, Lounatmaa K. 1976. Ultrastructure and Life Cycle of the Lipid-  
438 containing Bacteriophage  $\phi 6$ . *J Gen Virol* 32:249–259.
- 439 23. Weidenbach K, Nickel L, Neve H, Alkhnbashi OS, Künzel S, Kupczok A, Bauersachs T,  
440 Cassidy L, Tholey A, Backofen R, Schmitz RA. 2017. Methanosarcina Spherical Virus, a Novel  
441 Archaeal Lytic Virus Targeting Methanosarcina Strains. *J Virol* 91:e00955-17.
- 442 24. Team RC. 2018. R: A language and environment for statistical computing; 2015.
- 443 25. Ryan CG, Clayton E, Griffin WL, Sie SH, Cousens DR. 1988. SNIP, a statistics-sensitive  
444 background treatment for the quantitative analysis of PIXE spectra in geoscience applications.  
445 *Nucl Instrum Methods Phys Res Sect B Beam Interact Mater At* 34:396–402.
- 446 26. Gibb S, Strimmer K. 2012. MALDIquant: a versatile R package for the analysis of mass  
447 spectrometry data. *Bioinformatics* 28:2270–2271.
- 448 27. Oksanen J, Blanchet FG, Kindt R, Legendre P, Minchin PR, O'hara R, Simpson GL, Solymos  
449 P, Stevens MHH, Wagner H. 2013. vegan: Community Ecology Package. R package version 2.5-  
450 7. *Community Ecol Package Version 2*:1–295.
- 451 28. Paradis E, Schliep K. 2019. ape 5.0: an environment for modern phylogenetics and  
452 evolutionary analyses in R. *Bioinformatics* 35:526–528.
- 453 29. Thévenot EA, Roux A, Xu Y, Ezan E, Junot C. 2015. Analysis of the Human Adult Urinary  
454 Metabolome Variations with Age, Body Mass Index, and Gender by Implementing a  
455 Comprehensive Workflow for Univariate and OPLS Statistical Analyses. *J Proteome Res* 14:3322–

456 3335.

457 30. Dinno A, Dinno MA. 2017. Package 'dunn. test.' CRAN Repos 10:1–7.

458 31. Benevides JM, Overman SA, Thomas GJ. 2003. Raman Spectroscopy of Proteins. Curr

459 Protoc Protein Sci 33:17.8.1-17.8.35.

460

461

462 **Table 1** | Wavenumbers assigned to biomolecules of microbial cells and their density in the  
 463 contrast plots of infected and uninfected cells. A high positive density refers to prominence in  
 464 infected cells, a negative value refers to wavenumbers more prominent in the control sample.  
 465 Bold: Wavenumbers chosen for calculating the ratio for differentiating virocells from uninfected  
 466 cells.

| Wavenumber  | Density <i>P. syringae</i> | Density <i>B. subtilis</i> | Peak assignment(12, 13, 15, 31)                 |
|-------------|----------------------------|----------------------------|-------------------------------------------------|
| 623         | -0.0103                    | 0.0000                     | 623 Adenine                                     |
| 645         | -0.0047                    | 0.0003                     | 645 Cytosine, Adenine                           |
| 669         | 0.0139                     | 0.0066                     | 668 Guanine                                     |
| 726         | 0.0031                     | 0.0180                     | 723/724 Adenine                                 |
| 748         | -0.0094                    | -0.0154                    | 740 Thymine                                     |
| 784         | 0.0634                     | 0.03444                    | 785 Cytosine/ Uracil                            |
| 855         | -0.0399                    | 0.0049                     | 848 Ribose /O-P-O stretch                       |
| 902         | -0.0471                    | -0.0042                    | Various metabolites                             |
| 961         | -0.0598                    | 0.0006                     | 960 Valin/Leucin                                |
| <b>1005</b> | <b>-0.1428</b>             | <b>0.0020</b>              | <b>1004 Phenylalanine</b>                       |
|             |                            |                            | 1035 Proteins/<br>1034 Phosphoenolpyruvate      |
| 1034        | -0.0626                    | 0.0014                     |                                                 |
| 1096        | -0.0084                    | 0.0078                     | 1101 PO <sub>2</sub> <sup>-</sup>               |
| 1175        | -0.0207                    | -0.0035                    | 1174 L-Histidine                                |
|             |                            |                            | 1230- 1310 Amide III interval<br>1240 Uracil    |
| 1241        | -0.0018                    | 0.0189                     |                                                 |
| 1336        | 0.0442                     | 0.0072                     | 1337 Adenine                                    |
| 1452        | -0.0466                    | -0.0090                    | 1440 Lipids                                     |
| 1482        | 0.0922                     | 0.0346                     | 1482 Guanine/Adenine                            |
| <b>1577</b> | <b>0.1333</b>              | <b>-0.0207</b>             | <b>1573 Adenine, Guanine</b>                    |
|             |                            |                            | <b>1640-1680 Amide 1</b><br><b>1671 Thymine</b> |
| <b>1671</b> | <b>-0.1031</b>             | <b>0.0397</b>              |                                                 |

467

468

469

470 **Figure 1** | *Pseudomonas syringae* cultures without (black, empty triangles) and with (green, filled  
471 triangles) addition of phage phi6. The drop in optical density corresponds to viral cell lysis after  
472 34 h; A: Growth curve determined by optical density; vertical red line highlighting the time of  
473 harvest. B: Principal Component Analyses of *P. syringae* single cell Raman spectra after lysis.  
474 (Ordination analyses based on Euclidean distance and spectral contrast angle revealed nearly  
475 identical results, see Figure S1) and the result of the Multi Response Permutation Procedure  
476 (MRPP) for control sample vs. infected sample.

477

478 **Figure 2** | Evaluation of wavenumbers for virocell identification in *P. syringae*; **A**: Contrast plot  
479 (green) of potential infected cells in comparison to the wavenumber influence on PC 1 (black,  
480 dashed) and PC 2 (grey, line dotted), long, blue lines at the bottom indicate wavenumbers that  
481 decreased in virocells, red lines indicate wavenumbers increasing in virocells. **B**: Average Raman  
482 spectra of the samples with (green, solid) and without phage addition (black, dashed). Green  
483 lines at the top indicate the positions of the labeled peaks in the Raman spectra, black lines  
484 indicate peak maxima of the VIP of the OPLS; **C**: PCA of single cell Raman spectra from cultures  
485 with phages (filled triangle) and without phages (empty triangle); virocells identified based on  
486 the determined ratio are highlighted in green.

487

488 **Figure 3** | Boxplot of the determined ratio for control (no virus addition) and infected (with virus  
489 addition) samples of *B. subtilis* (red), *M. mazei* (blue) and *P. syringae* (green). Asterix indicating

490 significance according to Wilcoxon Test (\*\*\*) highly significant  $<0.0001$ , no asterix =not  
491 significant,  $p$ -value  $< 0.06$ ). For a detailed multiple comparison across species (based on Dunn's  
492 test) please see Supplementary Table 2.

493

494 **Figure 4** | Evaluation of wavenumbers for virocell identification in *B. subtilis*; **A:** Contrast plot  
495 (red) of potential infected cells in comparison to the wavenumber influence on PC 1 (black,  
496 dashed) and PC 2 (grey, dotted), long, blue lines at the bottom indicate wavenumbers which  
497 decrease in virocells, red lines indicate wavenumbers increasing in virocells. **B:** Average Raman  
498 spectra of the samples with (red, solid) and without phage addition (black, dashed). Red lines at  
499 the top indicate the positions of the labeled peaks in the Raman spectra, black lines indicate  
500 peaks of the OPLS-importance; **C:** PCA of single cell Raman spectra with (filled dots) and without  
501 phage addition (empty dots), virocells identified based on the determined ratio are highlighted  
502 in red.

503

504 **Figure 5** | The laser of the Raman microspectroscope is focused on a single microbial cell. The  
505 presence of viral particles replicated inside the cell alters the Raman spectrum especially in the  
506 determined areas. Virocells can be determined by calculation a ratio based on these intensities.

507



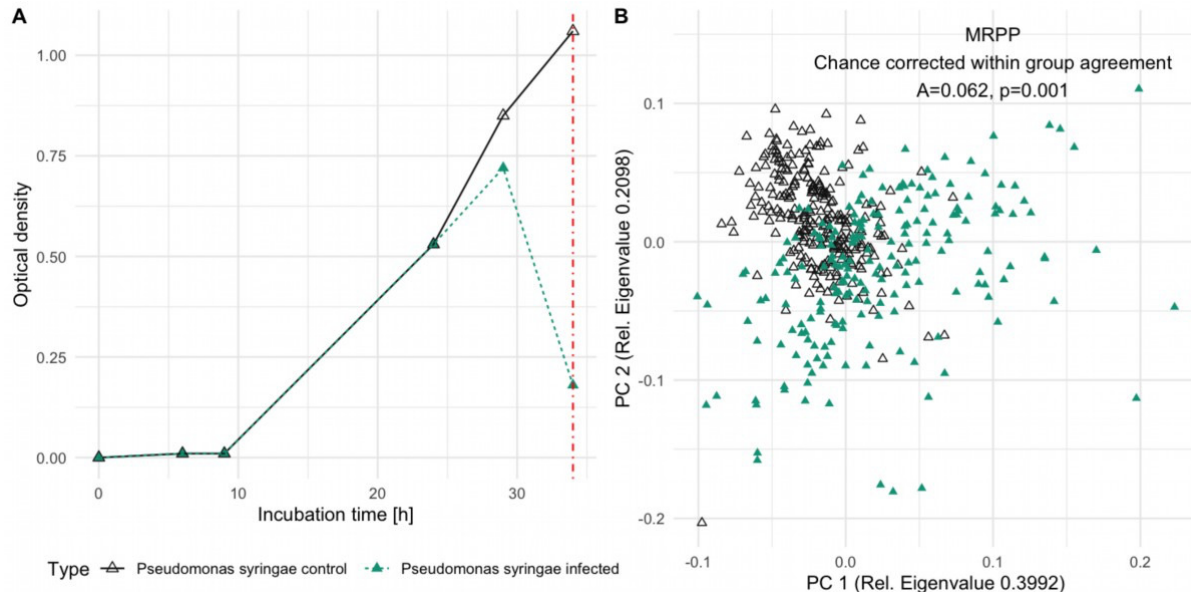

1

2 **Figure 1** | *Pseudomonas syringae* cultures without (black, empty triangles) and with (green, filled  
3 triangles) addition of phage phi6. The drop in optical density corresponds to viral cell lysis after  
4 34 h; A: Growth curve determined by optical density; vertical red line highlighting the time of  
5 harvest. B: Principal Component Analyses of *P. syringae* single cell Raman spectra after lysis.  
6 (Ordination analyses based on Euclidean distance and spectral contrast angle revealed nearly  
7 identical results, see Figure S1) and the result of the Multi Response Permutation Procedure  
8 (MRPP) for control sample vs. infected sample.

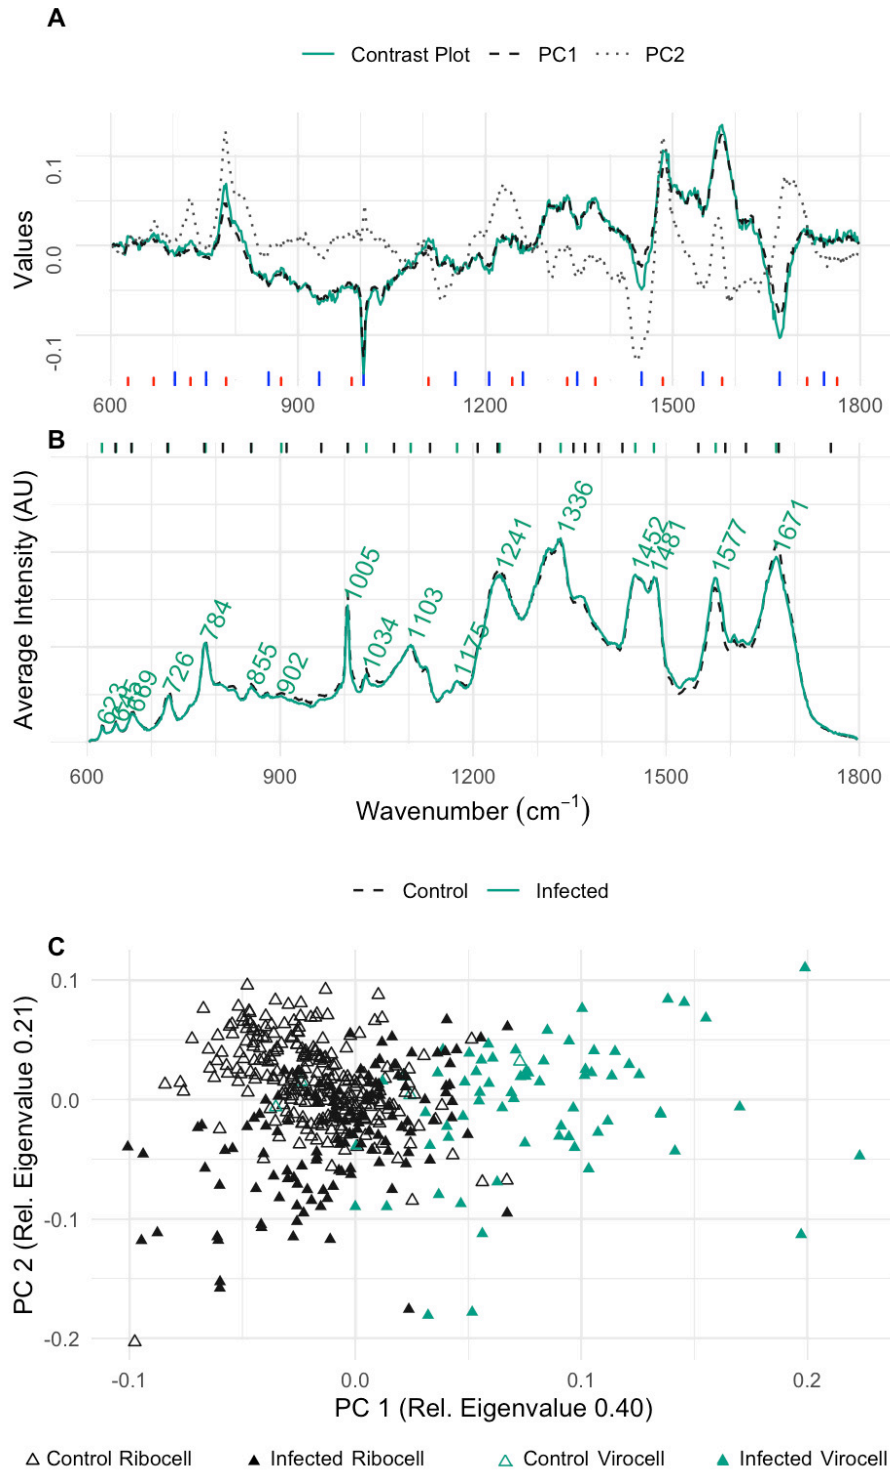

9

10 **Figure 2** | Evaluation of wavenumbers for virocell identification in *P. syringae*; **A**: Contrast plot  
11 (green) of potential infected cells in comparison to the wavenumber influence on PC 1 (black,

12 dashed) and PC 2 (grey, line dotted), long, blue lines at the bottom indicate wavenumbers that  
13 decreased in virocells, red lines indicate wavenumbers increasing in virocells. **B:** Average Raman  
14 spectra of the samples with (green, solid) and without phage addition (black, dashed). Green lines  
15 at the top indicate the positions of the labeled peaks in the Raman spectra, black lines indicate  
16 peak maxima of the VIP of the OPLS; **C:** PCA of single cell Raman spectra from cultures with  
17 phages (filled triangle) and without phages (empty triangle); virocells identified based on the  
18 determined ratio are highlighted in green.

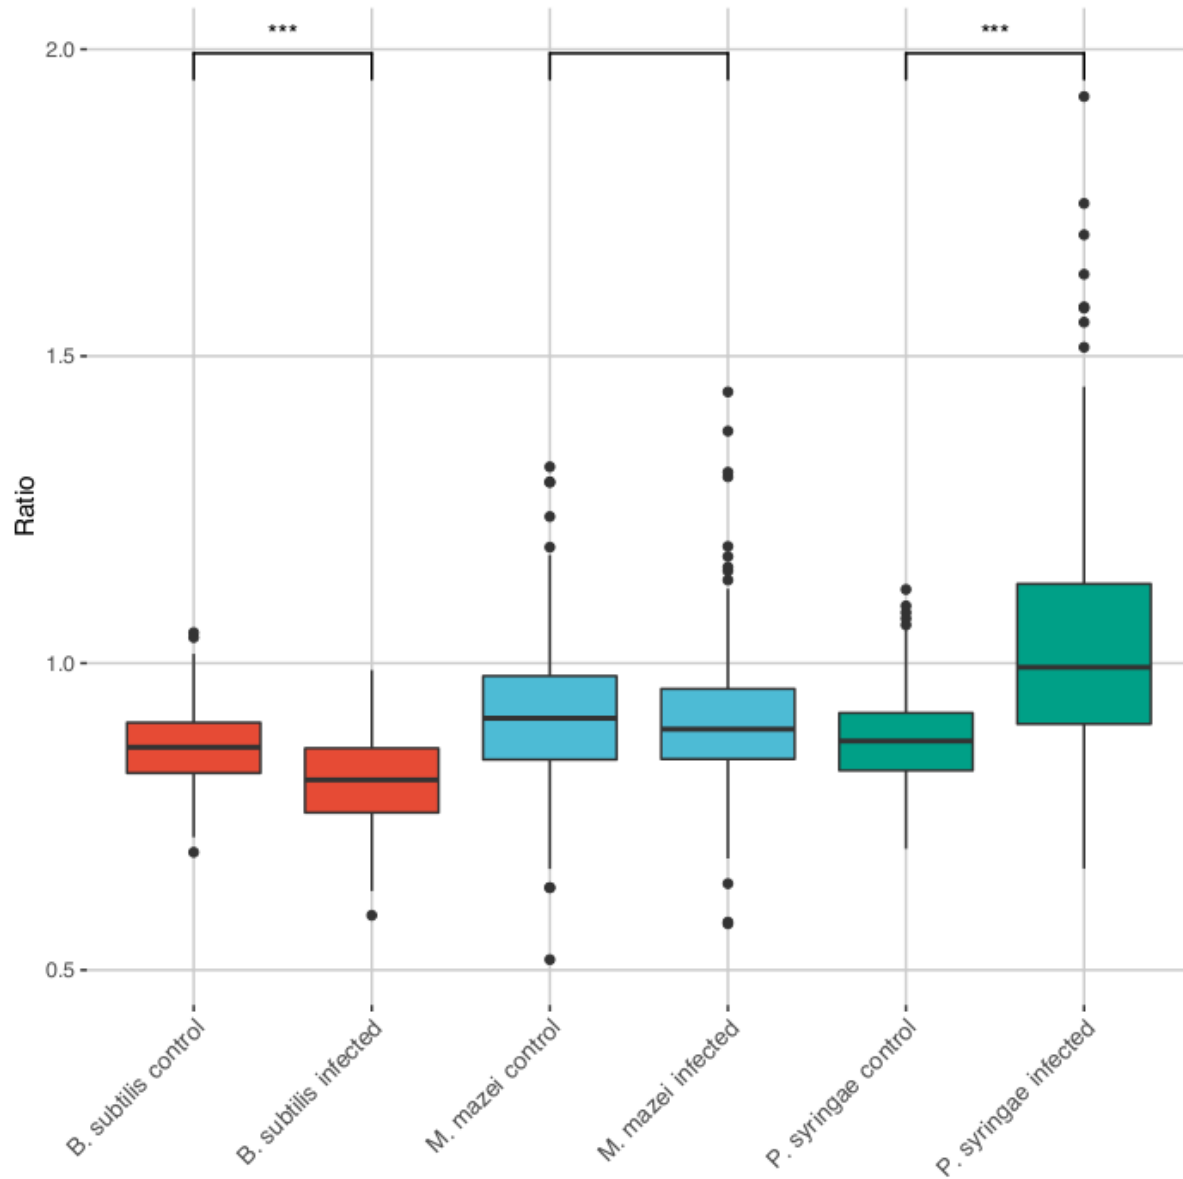

19

20 **Figure 3** | Boxplot of the determined ratio for control (no virus addition) and infected (with virus  
21 addition) samples of *B. subtilis* (red), *M. mazei* (blue) and *P. syringae* (green). Asterix indicating  
22 significance according to Wilcoxon Test (\*\*\*) highly significant  $<0.0001$ , no asterix =not  
23 significant,  $p$ -value  $< 0.06$ ). For a detailed multiple comparison across species (based on Dunn's  
24 test) please see Supplementary Table 2.

25

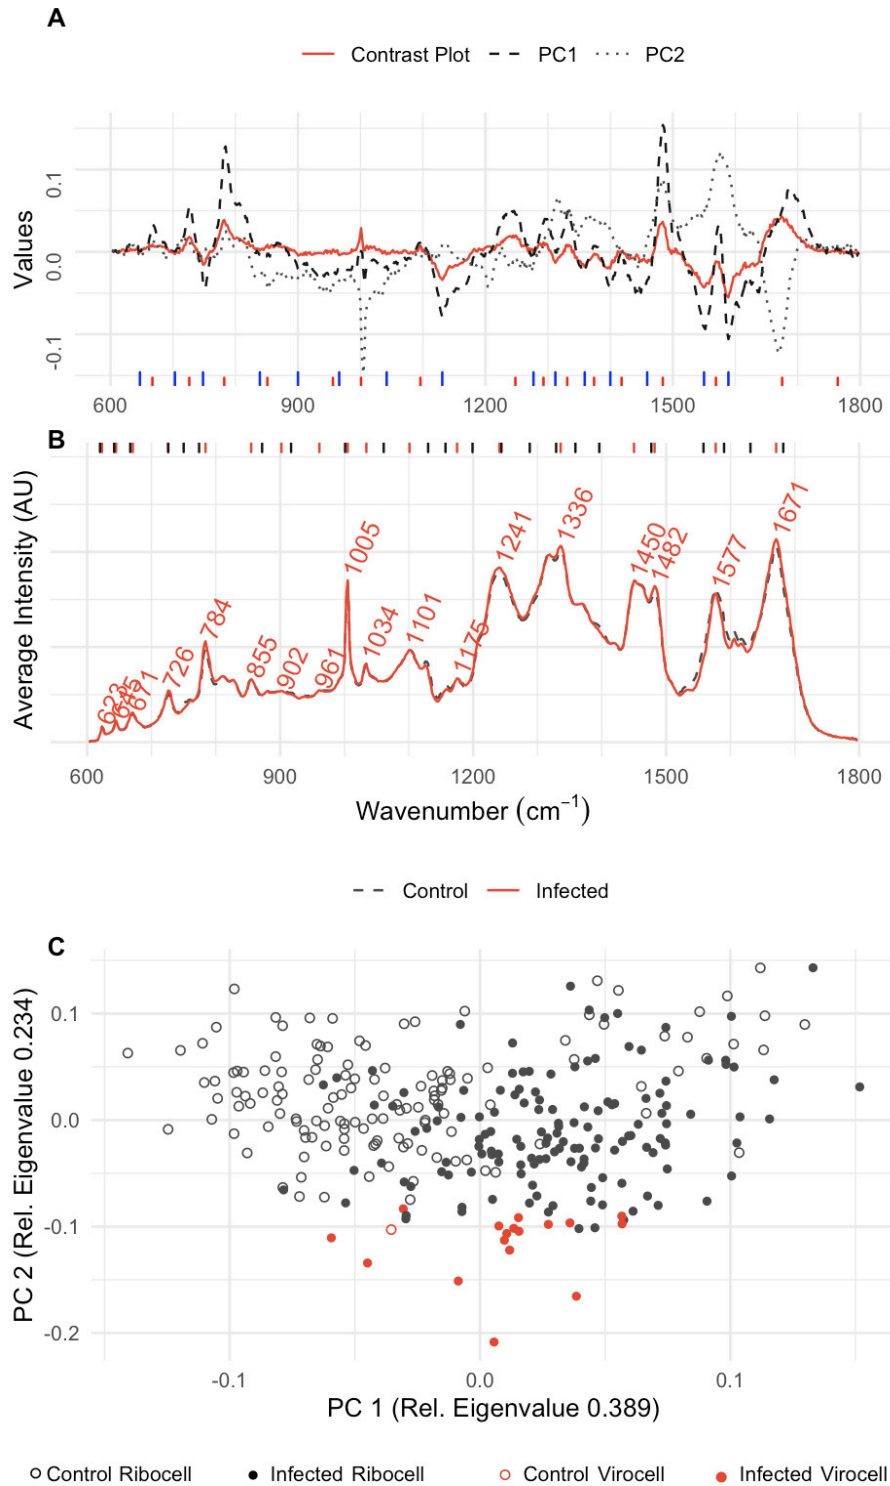

26

27 **Figure 4** | Evaluation of wavenumbers for virocell identification in *B. subtilis*; A: Contrast plot

28 (red) of potential infected cells in comparison to the wavenumber influence on PC 1 (black,

29 dashed) and PC 2 (grey, dotted), long, blue lines at the bottom indicate wavenumbers which  
30 decrease in virocells, red lines indicate wavenumbers increasing in virocells. **B:** Average Raman  
31 spectra of the samples with (red, solid) and without phage addition (black, dashed). Red lines at  
32 the top indicate the positions of the labeled peaks in the Raman spectra, black lines indicate  
33 peaks of the OPLS-importance; **C:** PCA of single cell Raman spectra with (filled dots) and without  
34 phage addition (empty dots), virocells identified based on the determined ratio are highlighted  
35 in red.

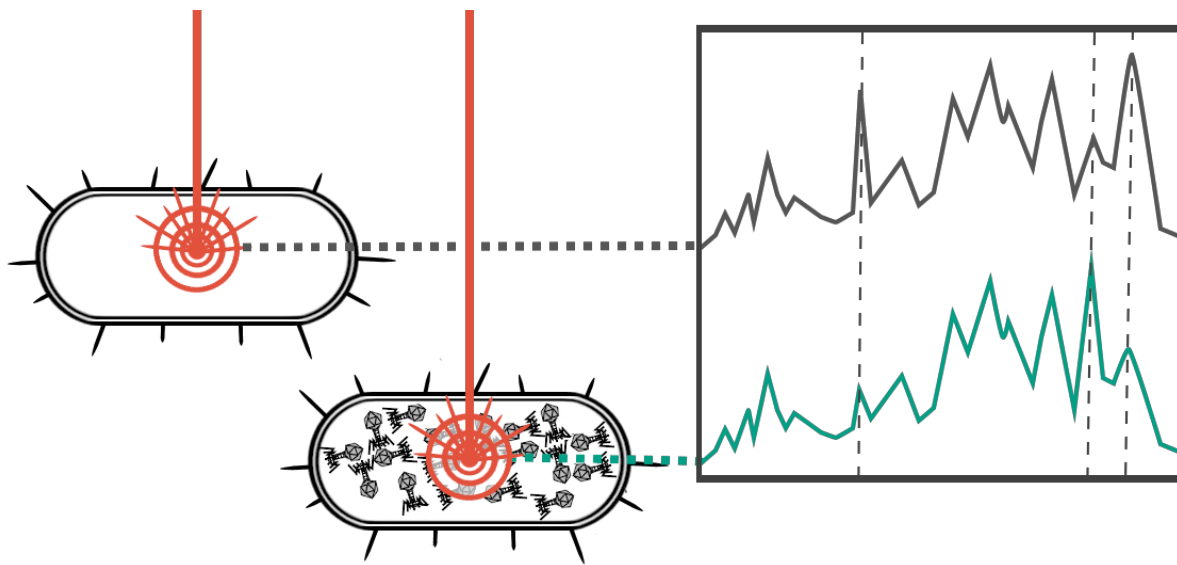

36  
37 **Figure 5** | The laser of the Raman microspectroscope is focused on a single microbial cell. The  
38 presence of viral particles replicated inside the cell alters the Raman spectrum especially in the  
39 determined areas. Virocells can be determined by calculation a ratio based on these intensities.

40

41
